# Supplementary material
Source: Research Square preprint supplement (doi:10.21203/rs.3.rs-9564825/v1)
Supplement: Supplementary file 1 [file fdb5d05e642cb75fff9a52bd.xlsx]

## Sheet: README
Title of this file: Fitting Kads' with the Analytical solution for transient DET responses
Description:
This spreadsheet implements i) the analytical solution for the transient
DET response under 1D diffusion with fast equilibrium between a dissolved analyte and its adsorbed form
and ii) finds Kads' that minimizes the squared differences between experimental and theoretical concentrations in experiments with one and two diffusive-gel discs.
Reference: 2026 article by L. Yabuki, C. Rey-Castro, C. de Faria, J. Puy, C. Cantero-Martínez and J. Galceran with the title: Phosphorus desorption and dynamics in calcareous Mediterranean agricultural soils assessed by DET (Diffusive Equilibrium in Thin-films) and DGT (Diffusive Gradients in Thin-films) passive sampling combined with analytical modelling
Purpose:
To estimate KD and the resupply capacity of soils from transient DET data.
Instructions:
1. Please, enter experimental data in the sheet "INPUT_DATA"							A cell with yellow background should not be modified unless you want to modify its formula
2. Please, adjust parameters and run Solver in the sheet "MODEL"							A cell with yellow background should not be modified unless you want to modify its formula
The retrieved K'ads is in cell B25 of the sheet "MODEL"
Units:
All units must be the in the International System of units.
However, any concentration unit (e.g. µg L-1 or mol m-3) can be used as long as it is simultaneously applied in the sheet INPUT_DATA and in the cell B17 of the sheet MODEL
Limitation:
The current computation of the analytical solution in the sheet MODEL uses nmax=5. If more terms were needed, more rows following the sequence 0, 1, 2, 3, 4, 5, 6 and up to the desired nmax have to be added in columns from J to AH.
Also the final values in columns V and AH have to be gathered in the cells C37:C42 and C45:C50
Contact:
josep.galceran@udl.cat

## Sheet: INPUT_DATA
Single diffusive gel disc
Time (s)	DET concentration experimental (µg L⁻¹)
5880	0.0478222
11880	0.0571484
27240	0.0645328
84000	0.0693965
175680	0.0712741
258180	0.0714224
Double (i.e. two diffusive gel disc of equal thickness)
Time (s)	DET concentration experimental (µg L⁻¹)
5880	0.0338041
11880	0.0412164
27240	0.0547944
84000	0.0636377
175680	0.066756
258180	0.0686091

## Sheet: MODEL
									4. Sum 1 and Sum 2 Calculation				cMz single	cMz single	cMz single	cMz single	cMz single	cMz single	cMz single	cMz single	cMz single		cMz double	cMz double	cMz double	cMz double	cMz double	cMz double	cMz double	cMz double	cMz double	cMz double	cMz double
1. Constants Parameters (please, input or check parameters in cells with white background)									Analytical Sol.		cMz1	cMz2	cMz3	cMz4	cMz8		cMz5	cMz6	cMz7	cMz9	cMz single		cMz1	cMz2	cMz3	cMz4	cMz8		cMz5	cMz6	cMz7	cMz9	cMz double
Parameter	Value	Unit						nmax	Time (s)	n	First term in Sum 1	Exponential term in Sum 1	Error function (erfc) term in Sum 1	Sum 1(for a given n)	Total Sum 1	First term in Sum 1	Exponential term in Sum 1	Error function (erfc) term in Sum 1	Sum 2(for a given n)	Total Sum 2	cMz single		First term in Sum 1	Exponential term in Sum 1	Error function (erfc) term in Sum 1	Sum 1(for a given n)	Total Sum 1	First term in Sum 1	Exponential term in Sum 1	Error function (erfc) term in Sum 1	Sum 2(for a given n)	Total Sum 2	cMz double
deltag	0.000720755	m
deltaf	0.00013	m						5	5880	0	1	0.995594	0.925125	76.7157	73.0464	1	0.524484	0.255922	13.8513	13.5932	0.0527285		1	0.827678	0.538534	35.697	35.6482	1	0.253334	0.0974926	4.39992	4.39908	0.0277146
l (physically real))	0.000850755	m							5880	1	-0.39733	0.416219	0.185489	-3.72708		-0.39733	0.0608515	0.0179744	-0.25949				-0.39733	0.015484	0.00388693	-0.0487806		-0.39733	0.000443999	8.51944e-05	-0.000840449
l_equivalent	0.00164457	m							5880	2	0.157871	0.0383223	0.0106461	0.0579584		0.157871	0.00155489	0.000322892	0.00135999				0.157871	1.65867e-06	2.47796e-07	7.69671e-07		0.157871	4.45579e-09	5.59412e-10	1.47285e-09
l double	0.00157151	m							5880	3	-0.0627271	0.000777087	0.000154225	-0.000247704		-0.0627271	8.7502e-06	1.39115e-06	-1.82025e-06				-0.0627271	1.0174e-12	1.07354e-13	-9.49915e-14		-0.0627271	2.56048e-16	2.37871e-17	-1.85973e-17
l_equivalent double	0.00303784	m							5880	4	0.0249234	3.47039e-06	5.32466e-07	2.67737e-07		0.0249234	1.08449e-08	1.39262e-09	5.91473e-10				0.0249234	3.57336e-21	2.90794e-22	7.93596e-23		0.0249234	8.42507e-26	6.20286e-27	1.53422e-27
z	0.00013	m	currently nmax=5 terms are taken. If cell O10 is not negligible in front of O5, then, more terms should be added (new rows below row10)						5880	5	-0.00990282	3.41331e-09	4.25727e-10	-6.98688e-11		-0.00990282	2.96021e-12	3.18364e-13	-4.53008e-14				-0.00990282	7.18651e-32	4.75527e-33	-4.20664e-34		-0.00990282	1.58738e-37	9.67279e-39	-7.88791e-40
z_equivalent	0.000251299	m						5	11880	0	1	0.997817	0.947284	113.065	102.135	1	0.726577	0.424137	37.1063	34.753	0.0597606		1	0.910637	0.66524	67.6287	66.6742	1	0.506826	0.24368	18.5429	18.4379	0.0427803
z double	0.000850755	m							11880	1	-0.39733	0.648013	0.351596	-11.6078		-0.39733	0.250193	0.0959836	-2.44044				-0.39733	0.127082	0.0422329	-0.956197		-0.39733	0.021909	0.00570338	-0.105016
z_equivalent double	0.00164457	m							11880	2	0.157871	0.199012	0.0723547	0.70026		0.157871	0.0407411	0.0114054	0.0888408				0.157871	0.00137744	0.0002837	0.00168588		0.157871	7.35596e-05	1.28354e-05	6.55222e-05
Original φs	0.46	none							11880	3	-0.0627271	0.0289028	0.00776176	-0.0231788		-0.0627271	0.00313729	0.000685265	-0.00170599				-0.0627271	1.15961e-06	1.711e-07	-2.96647e-07		-0.0627271	1.91826e-08	2.50055e-09	-3.85424e-09
φg	0.94	none							11880	4	0.0249234	0.00198501	0.000419278	0.000402412		0.0249234	0.000114245	2.03707e-05	1.67487e-05				0.0249234	7.58239e-11	8.68288e-12	4.69609e-12		0.0249234	3.88531e-13	4.03232e-14	1.98298e-14
DMg	6.08e-10	m²/s							11880	5	-0.00990282	6.44688e-05	1.11785e-05	-3.55861e-06		-0.00990282	1.96737e-06	2.95695e-07	-8.23572e-08				-0.00990282	3.85079e-16	3.59738e-17	-6.34562e-18		-0.00990282	6.11217e-19	5.26357e-20	-8.57512e-21
cMStar	0.0717275	µg L⁻¹	(to match the units in INPUT_DATA)					5	27240	0	1	0.999047	0.965172	176.22	149.52	1	0.869965	0.597617	88.39	76.9733	0.0643408		1	0.959996	0.775072	127.09	119.562	1	0.743502	0.441351	59.1521	56.7123	0.0557408
Area piston	0.000491	m²							27240	1	-0.39733	0.827613	0.53845	-30.5216		-0.39733	0.54648	0.271626	-12.7446				-0.39733	0.406696	0.179788	-7.72787		-0.39733	0.188933	0.0679141	-2.48212
Area opening	0.000254	m²							27240	2	0.157871	0.494567	0.235365	4.24907		0.157871	0.24763	0.0947572	1.4466				0.157871	0.0565305	0.0165267	0.202266		0.157871	0.0157523	0.00396116	0.0425784
OriginalDMs	2.67617e-10	m²/s							27240	3	-0.0627271	0.213196	0.0787224	-0.46413		-0.0627271	0.0809448	0.024941	-0.126777				-0.0627271	0.00257815	0.000554938	-0.00206461		-0.0627271	0.000430919	8.2541e-05	-0.000276247
									27240	4	0.0249234	0.0662966	0.0198251	0.0390445		0.0249234	0.0190867	0.00489582	0.00845316				0.0249234	3.85787e-05	6.532e-06	7.75158e-06		0.0249234	3.86775e-06	5.95836e-07	6.47302e-07
2. Initial Guess for Kadsprime (please, start with a reasonable value in B25)									27240	5	-0.00990282	0.0148717	0.00371811	-0.00249427		-0.00990282	0.00324662	0.000710994	-0.000424127				-0.00990282	1.89408e-07	2.63574e-08	-1.03352e-08		-0.00990282	1.13903e-08	1.46451e-09	-5.3259e-10
								5	84000	0	1	0.999691	0.980163	316.945	251.861	1	0.955831	0.763735	218.498	175.594	0.0676414		1	0.986848	0.870737	264.659	227.628	1	0.908361	0.66107	178.268	155.637	0.0638484
Description	Initial Guess (will be converted by Solver into the optimized K'ads)						5		84000	1	-0.39733	0.940486	0.726107	-80.7833		-0.39733	0.822051	0.5313	-52.651				-0.39733	0.74695	0.444939	-41.7077		-0.39733	0.582528	0.298528	-25.1519
K'ads	50								84000	2	0.157871	0.795869	0.499198	19.2621		0.157871	0.635944	0.341367	11.8163				0.157871	0.393897	0.172241	5.12288		0.157871	0.26027	0.100849	2.73053
									84000	3	-0.0627271	0.605805	0.316732	-4.27441		-0.0627271	0.442529	0.201634	-2.45839				-0.0627271	0.144719	0.0492759	-0.477767		-0.0627271	0.0810182	0.0249671	-0.222885
3. Calculated Variables based on Kadsprime (automatically done)									84000	4	0.0249234	0.414788	0.184628	0.878727		0.0249234	0.276991	0.109077	0.472229				0.0249234	0.0370438	0.0102478	0.0331697		0.0249234	0.0175707	0.00446814	0.0134456
									84000	5	-0.00990282	0.25546	0.0985174	-0.166694		-0.00990282	0.155953	0.0538802	-0.08346				-0.00990282	0.00660627	0.00153221	-0.00168938		-0.00990282	0.0026549	0.000572695	-0.000591836
Description	Formula							5	175680	0	1	0.999852	0.986282	462.829	356.79	1	0.978632	0.835351	359.929	279.119	0.0688861		1	0.99369	0.910412	409.246	334.852	1	0.955084	0.761761	314.816	259.926	0.0664517
DMs_effective	5.24738e-12								175680	1	-0.39733	0.971088	0.808601	-136.354		-0.39733	0.910562	0.665101	-103.302				-0.39733	0.869792	0.597356	-89.1364		-0.39733	0.772304	0.472229	-65.1788
φs_effective	23.46								175680	2	0.157871	0.896578	0.640308	38.9449		0.157871	0.80539	0.51059	28.699				0.157871	0.640524	0.345224	17.3318		0.157871	0.5254	0.256566	11.9896
									175680	3	-0.0627271	0.786908	0.488746	-10.7642		-0.0627271	0.677189	0.37726	-7.70462				-0.0627271	0.396836	0.173962	-2.97877		-0.0627271	0.30071	0.121086	-1.94166
4. Calculate Squared Error (automatically done)									175680	4	0.0249234	0.656548	0.358963	2.8743		0.0249234	0.541277	0.267865	1.99566				0.0249234	0.206844	0.0758534	0.448779		0.0249234	0.144797	0.0493078	0.274731
Squared Error (for a time point)=(Experimental Concentration - cMz)^2									175680	5	-0.00990282	0.520734	0.253296	-0.740349		-0.00990282	0.411278	0.182522	-0.498039				-0.00990282	0.0907046	0.0284549	-0.0588662		-0.00990282	0.0586582	0.0172372	-0.0337529
								5	258180	0	1	0.999899	0.988684	563.212	428.741	1	0.98541	0.86387	458.551	350.539	0.0693561		1	0.995702	0.926049	509.117	407.752	1	0.969213	0.802523	411.476	331.747	0.0674078
Time (s)	DET concentration (Experimental) single	cMz_modelled_single	Squared error single	Total Sum of Squared Errors single					258180	1	-0.39733	0.980235	0.841625	-175.29		-0.39733	0.938236	0.72103	-140.227				-0.39733	0.909442	0.663043	-124.693		-0.39733	0.838774	0.553193	-97.4206
5880	0.0478222	0.0527285	2.40722e-05	4.39853e-05					258180	2	0.157871	0.928407	0.699905	53.4301		0.157871	0.863061	0.587326	41.9596				0.157871	0.73851	0.436206	28.3165		0.157871	0.645366	0.349334	21.3265
11880	0.0571484	0.0597606	6.82368e-06						258180	3	-0.0627271	0.849535	0.567945	-15.9333		-0.0627271	0.767018	0.466401	-12.2733				-0.0627271	0.533179	0.262069	-5.92736		-0.0627271	0.441471	0.200974	-4.29297
27240	0.0645328	0.0643408	3.68579e-08						258180	4	0.0249234	0.751031	0.449222	4.64401		0.0249234	0.658573	0.360727	3.5061				0.0249234	0.342236	0.143081	1.13788		0.0249234	0.268494	0.104871	0.790868
84000	0.0693965	0.0676414	3.0802e-06						258180	5	-0.00990282	0.64146	0.346015	-1.32176		-0.00990282	0.546307	0.271501	-0.977338				-0.00990282	0.195305	0.0707132	-0.199459		-0.00990282	0.145179	0.0494627	-0.132801
175680	0.0712741	0.0688861	5.70293e-06
258180	0.0714224	0.0693561	4.26943e-06
Time (s)	DET concentration (Experimental) double	cMz_modelled_double	Squared error double	Total Sum of Squared Errors double	Total Sum of Squared Errors (single and double)
5880	0.0338041	0.0277146	3.70813e-05	4.20031e-05	8.59884e-05
11880	0.0412164	0.0427803	2.44583e-06
27240	0.0547944	0.0557408	8.95666e-07
84000	0.0636377	0.0638484	4.44253e-08
175680	0.066756	0.0664517	9.26427e-08
258180	0.0686091	0.0674078	1.44325e-06
5. Minimize Squared Error using Solver
Please, in menu Data, Solver, Set Objective: Minimize cell $F$45
Variable Cell: B25 (Kadsprime)
Constraint: None (unless you want to restrict the range of Kadsprime)
